# Supplementary material for: Solution-processed Cu2XSnS4 (X = Fe, Co, Ni) photo-electrochemical and thin film solar cells on vertically grown ZnO nanorod arrays
Source: Royal Society of Chemistry journal article supplement (doi:10.1039/c6ra24149b), 2016-01-01
Supplement: c6ra24149b1.pdf [file c6ra24149b1.pdf]

## Supporting Information

### **Solution processed $\text{Cu}_2\text{XSnS}_4$ (X= Fe, Co, Ni) photo-electrochemical and thin film solar cells on vertically grown ZnO nanorod arrays**

Anima Ghosh<sup>1</sup>, Dharendra K. Chaudhary<sup>2</sup>, Amrita Biswas<sup>3</sup>, Rajalingam Thangavel<sup>1\*</sup> and G. Udayabhanu<sup>3</sup>

<sup>1</sup>Solar Energy Research Laboratory, Department of Applied Physics, Indian Institute of Technology (Indian School of Mines), Dhanbad- 826004, India.

<sup>2</sup>Molecular Electronics Research laboratory, Department of Physics, University of Allahabad, Allahabad-211004, India

<sup>3</sup>Department of Applied Chemistry, Indian Institute of Technology (Indian School of Mines), Dhanbad- 826 004, India

\*E-mail: rthangavel@gmail.com; thangavel.r.ap@ismdhanbad.ac.in

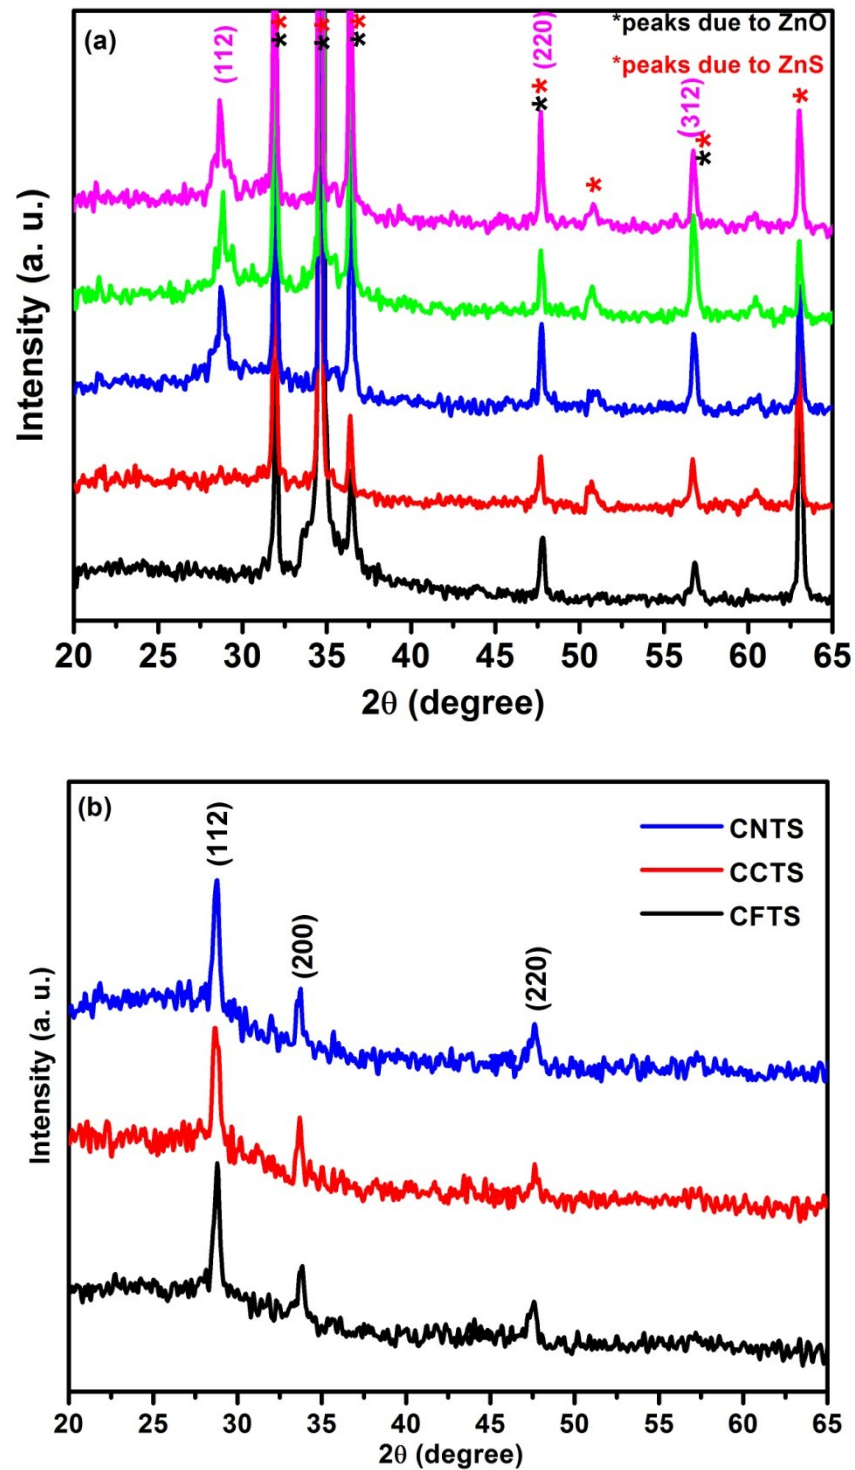

Figure S1. (a) Magnified view of Y-axis of Fig. 2 (b) XRD patterns of the CFTS, CCTS and CNTS thin films

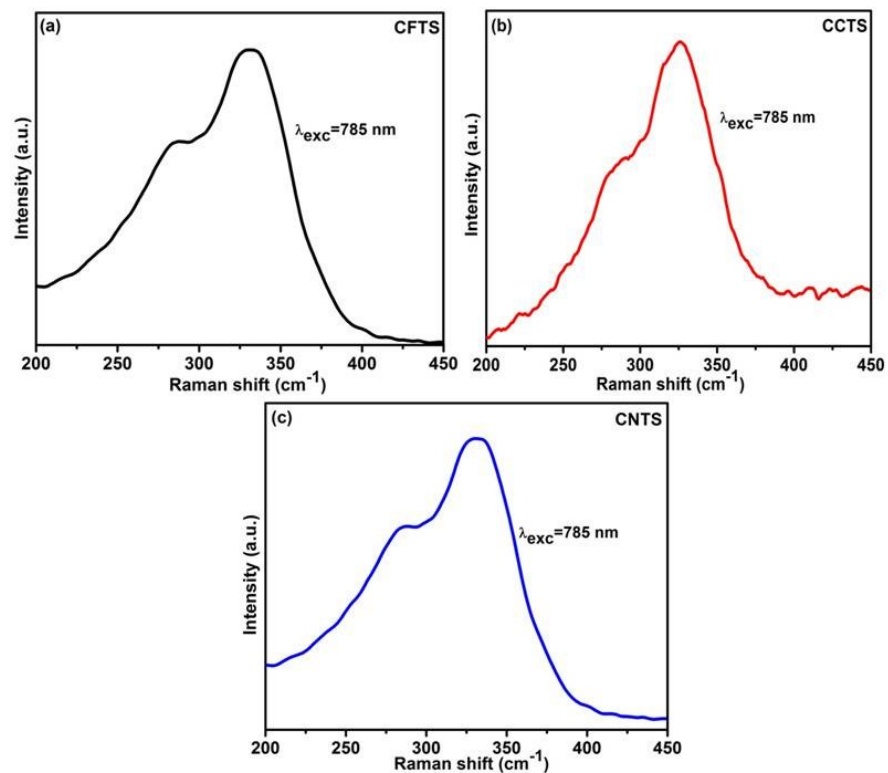

Figure S2: Raman spectra of the (a) CFTS, (b) CCTS and (c) CNTS thin films.[23]

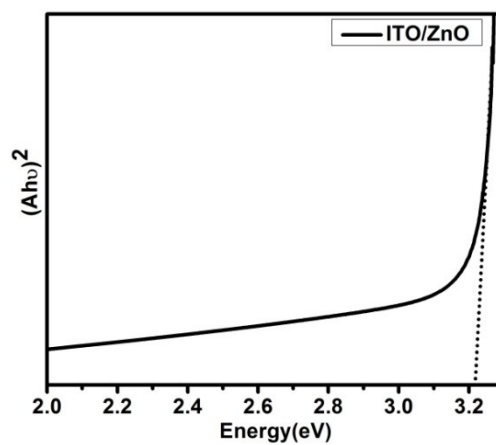

Figure S2(a): tauc plot of ZnO nanorod arrays.

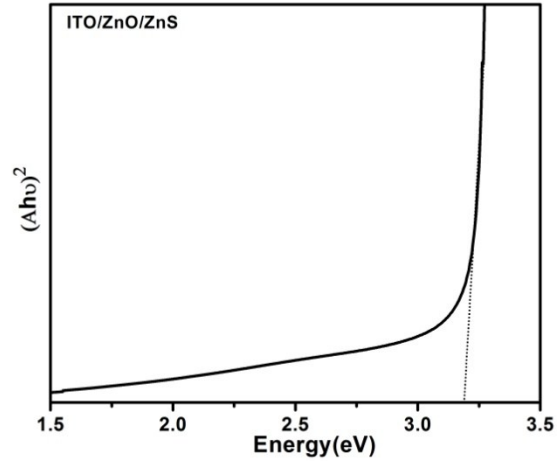

Figure S2(b): tauc plot of ZnO/ZnS.

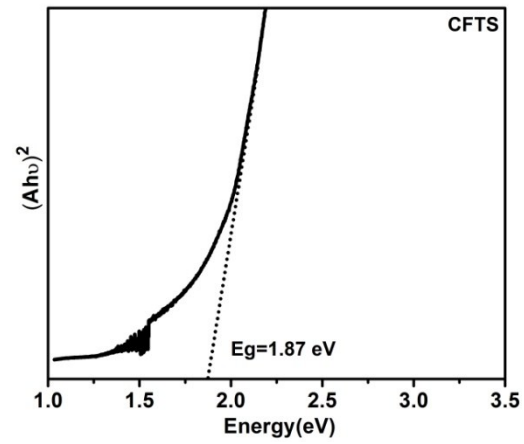

Figure S2(c): tauc plot of CFTS thin film.

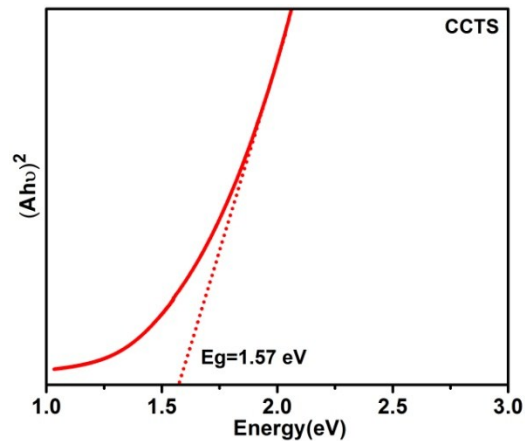

Figure S2(d): tauc plot of CCTS thin film.

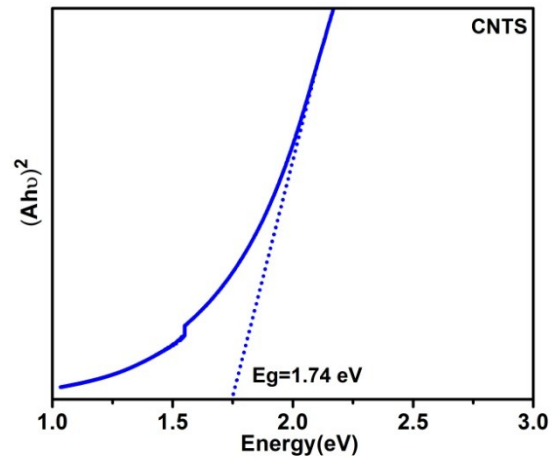

Figure S2(e): tauc plot of CNTS thin film.

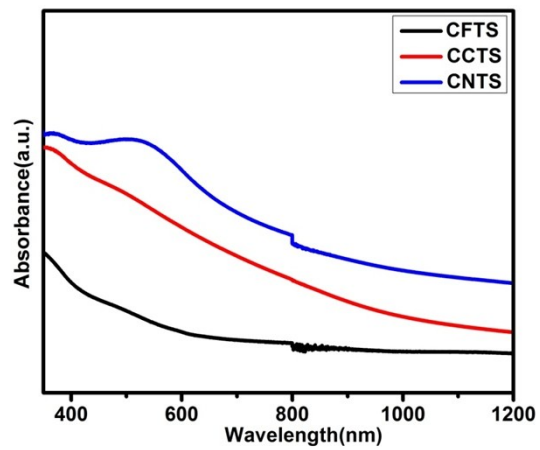

Figure S3: Absorption spectra of CFTS, CCTS and CNTS thin films.[23]

Note: the noise has come in absorption spectra of CFTS and CNTS due to instrumental error.

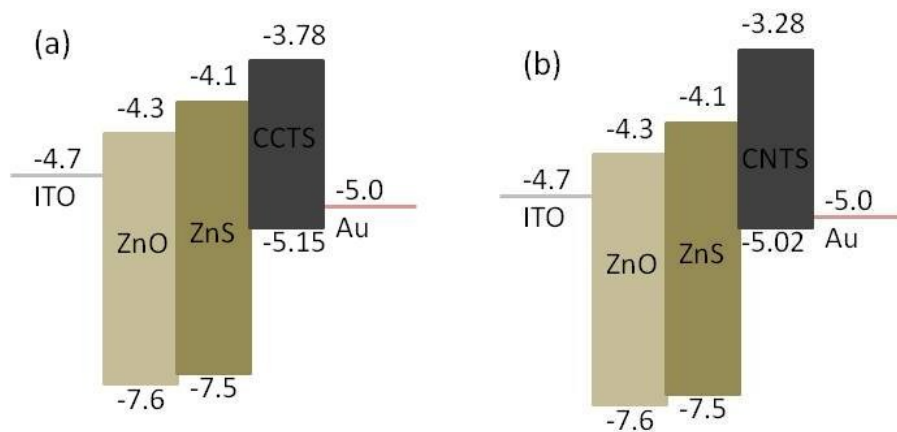

Figure S4: Energy level diagram: (a) ITO/ZnO/ZnS/CCTS/Au (b) ITO/ZnO/ZnS/CNTS/Au.

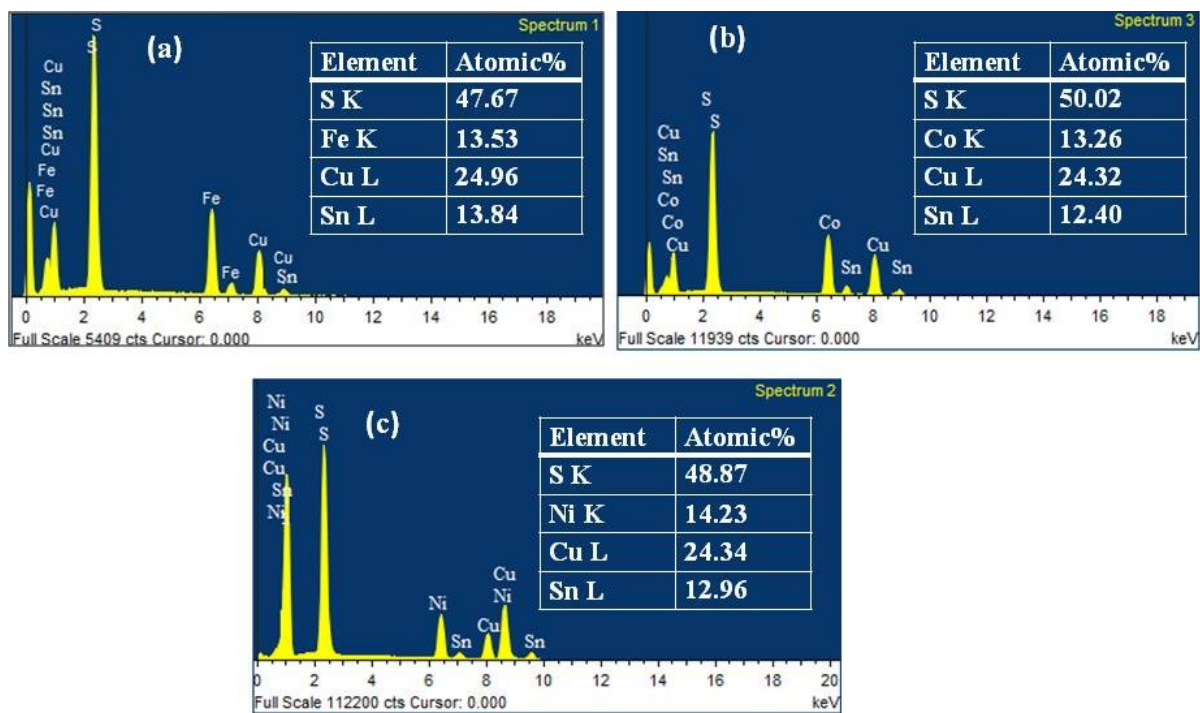

Figure S5: EDX spectra of (a) CFTS, (b) CCTS, and (c) CNTS. [23]
